# Supplementary material
Source: MDPI journal article supplement (https://www.mdpi.com/2571-8789/7/1/11)
Supplement: s1 [file s1]

**Table S1.** Historic of the crop systems applied in each area.

| Year | PAS     | NT1               | NT2                    | EUC                               | NF      |
|------|---------|-------------------|------------------------|-----------------------------------|---------|
| 2004 | Cerrado | Cerrado           | Cerrado                | Cerrado                           | Cerrado |
| 2005 | Soybean | Soybean           | Cerrado                | Cerrado                           | Cerrado |
| 2006 | Soybean | Soybean           | Soybean/Mombasa/Cattle | Eucalyptus/<br>Rice and<br>cowpea | Cerrado |
| 2007 | Maize   | Maize             | Soybean/Mombasa/Cattle | Soybean/<br>Mombasa               | Cerrado |
| 2008 | Soybean | Soybean           | Soybean/Mombasa/Cattle | Cattle                            | Cerrado |
| 2009 | Millet  | Millet            | Millet/Cattle          | Cattle                            | Cerrado |
| 2010 | Maize   | Maize             | Soybean/Millet         | Fallow*                           | Cerrado |
| 2011 | Maize   | Maize             | Soybean/Millet         | Fallow*                           | Cerrado |
| 2012 | Cotton  | Cotton            | Cotton                 | Fallow*                           | Cerrado |
| 2013 | Maize   | Maize             | Maize                  | Fallow*                           | Cerrado |
| 2014 | Soybean | Soybean           | Soybean                | Fallow*                           | Cerrado |
| 2015 | Maize   | Maize             | Maize                  | Fallow*                           | Cerrado |
| 2016 | Mombasa | Maize             | Mombasa                | Fallow*                           | Cerrado |
| 2017 | Mombasa | Soybean/<br>Maize | Maize                  | Fallow*                           | Cerrado |

PAS: Pasture species (Mombasa); NT1 and NT2: No-tillage system; EUC: Eucalyptus; NF: Native Cerrado forest. Cattle: Cattle under stocking rate of 2.4 animal unit ha<sup>-1</sup>. \* Fallow from animal and agricultural crop inputs, with the presence of mombasa grass between the Eucalyptus rows.

**Table S2.** Chemical properties (0-0.10 m depth) of the soils.

| Area | pH | P | K | Ca | Mg | Al | H+Al | Sand | Silt | Clay |
|------|----|---|---|----|----|----|------|------|------|------|
|------|----|---|---|----|----|----|------|------|------|------|

|     | (mg dm <sup>-3</sup> ) |      |       | (cmol <sub>c</sub> dm <sup>-3</sup> ) |     |      |     | (g kg <sup>-1</sup> ) |     |     |
|-----|------------------------|------|-------|---------------------------------------|-----|------|-----|-----------------------|-----|-----|
| PAS | 5.0                    | 37.8 | 121.2 | 5.08                                  | 0.8 | 0.04 | 5.1 | 775                   | 37  | 188 |
| NT1 | 4.8                    | 27.7 | 82.1  | 3.81                                  | 0.5 | 0.07 | 4.9 | 594                   | 270 | 136 |
| NT2 | 5.0                    | 38.8 | 78.2  | 3.33                                  | 0.7 | 0.06 | 3.3 | 687                   | 184 | 129 |
| EUC | 4.7                    | 58.2 | 50.8  | 2.79                                  | 0.9 | 0.11 | 5.2 | 518                   | 326 | 156 |
| NF  | 3.8                    | 2.5  | 35.2  | 0.65                                  | 0.3 | 1.30 | 8.3 | 639                   | 218 | 143 |

PAS: Pasture species (Mombasa); NT1 and NT2: No-tillage system; EUC: Eucalyptus; NF: Native Cerrado forest.

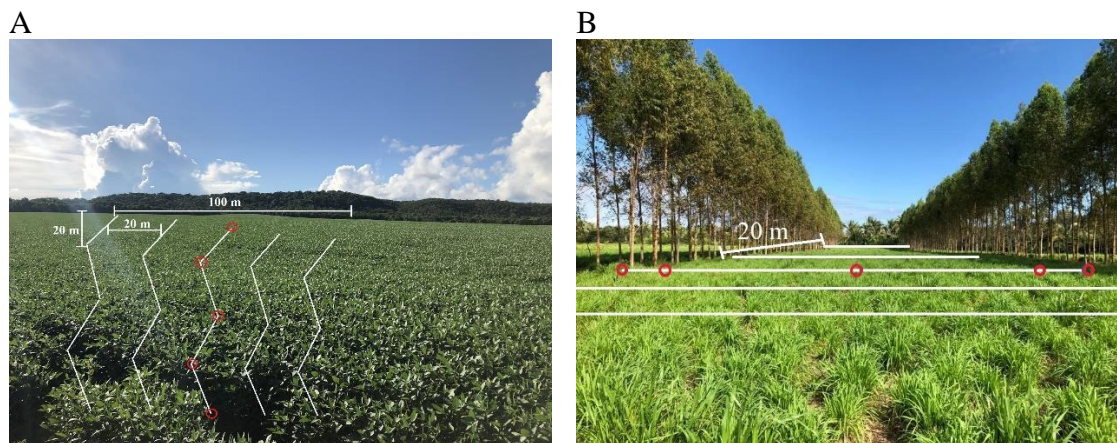

**Figure S1.** Sampling design. In NT1, NT2, PAS and NF, five 100-m transects distant approximately 20 m between them were sampled (A); In EUC, five 20-m spaced transects considered the transition from eucalyptus rows and spaces between rows (B). Five samples were taken per transect (red circles) and pooled to form a composite sample.
